# Supplementary material for: Reactivity of an amidinato silylene and germylene toward germanium(ii), tin(ii) and lead(ii) halides
Source: Royal Society of Chemistry journal article supplement (doi:10.1039/c7dt00051k), 2017-01-01
Supplement: c7dt00051k1.pdf [file c7dt00051k1.pdf]

## Reactivity of an Amidinato Silylene and Germylene toward Germanium(II), Tin(II) and Lead(II) Halides

Yu-Liang Shan,<sup>a</sup> Bi-Xiang Leong,<sup>a</sup> Hong-Wei Xi,<sup>b</sup> Rakesh Ganguly,<sup>a</sup> Yongxin Li,<sup>a</sup> Kok Hwa Lim<sup>b</sup>  
and Cheuk-Wai So<sup>\*a</sup>

<sup>a</sup>*Division of Chemistry and Biological Chemistry, School of Physical and Mathematical Sciences, Nanyang Technological University, 21 Nanyang Link, 637371 Singapore*

<sup>b</sup>*Singapore Institute of Technology, 10 Dover Drive, 138683 Singapore*

### Table of Content

1. Selected X-ray crystallographic data refinement
2. Theoretical studies of **2**, **3**, **5**, and **6**
3. Selected NMR spectra of **2**, **3** and **6**
4. Selected crystallographic data of **2**, **3**, **5**, and **6**.
5. Optimized geometries of **2**, **3**, **5**, and **6**
6. References

## 1. Selected X-ray crystallographic data refinement.

Compound **6** crystallized in P-1 space group with a formula of 'C<sub>23</sub> H<sub>45</sub> Cl<sub>2</sub> Ge N<sub>3</sub> O<sub>0.50</sub> Si<sub>2</sub> Sn' or 'C<sub>19</sub> H<sub>37</sub> Cl<sub>2</sub> Ge N<sub>3</sub> Si<sub>2</sub> Sn · 0.50 (C<sub>4</sub> H<sub>8</sub> O)' which is reasonable and correct. If the Z value is 1, the formula would be doubled and thus contains two Ge complex molecules and one THF molecule.

For compound **2**, the following restraints were used to restrain the geometry and thermal parameters of the toluene molecules.

sadi c57 c59 c57 c63

RIGU C43 > C63

SIMU 0.02 C43 > C63

ISOR 0.02 C43 > C63

## 2. Theoretical studies.

Compounds **2**, **3**, **5** and **6** were investigated using DFT<sup>1</sup> M06-2X<sup>2</sup> method with the LanL08d for Sn, Pb and 6-311+g(d) for other atoms level.<sup>3</sup> All calculations were carried out using the Gaussian 09 packages.<sup>4</sup> The NBO analyses were performed using the NBO 5.0 program at the same level.<sup>5</sup> The optimized geometries are in good agreement with their X-ray crystallographic data.

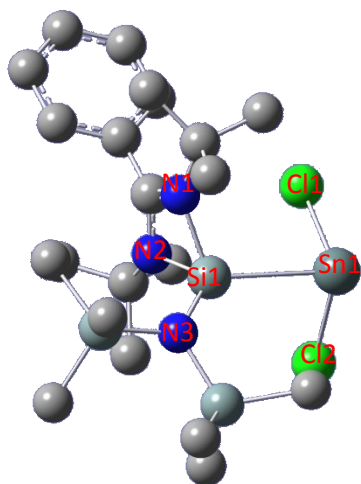

**Figure S1.** Molecular structure of calculated compound **2**. Hydrogen atoms are omitted for clarity. Selected bond lengths (Å) and angles (°): Si1-Sn1 2.786, Si1-N1 1.853, Si1-N2 1.851, Si1-N3 1.736; Cl1-Sn1-Cl2 96.70, Cl1-Sn1-Si1 86.38, Cl2-Sn1-Si1 87.68, Sn1-Si1-N1 108.86, Sn1-Si1-N2 113.23, Sn1-Si1-N3 125.47, N1-Si1-N2 70.62, N1-Si1-N3 112.62, N2-Si1-N3 112.90.

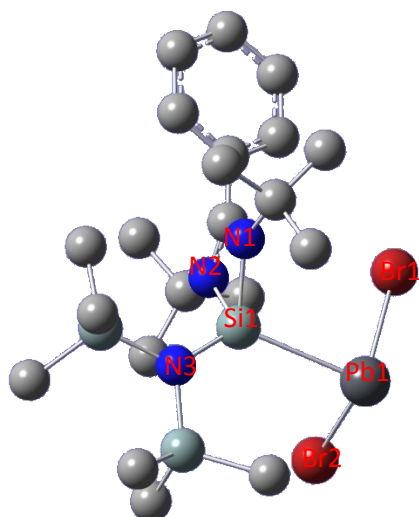

**Figure S2.** Molecular structure of calculated compound **3**. Hydrogen atoms are omitted for clarity. Selected bond lengths (Å) and angles (°): Si1-Pb1 2.844, Si1-N1 1.857, Si1-N2 1.852, Si1-N3 1.739; Br1-Pb1-Br2 101.93, Br1-Pb1-Si1 86.81, Br2-Pb1-Si1 88.65, Pb1-Si1-N1 110.41, Pb1-Si1-N2 114.75, Pb1-Si1-N3 124.09, N1-Si1-N2 70.54, N1-Si1-N3 111.98, N2-Si1-N3 112.64.

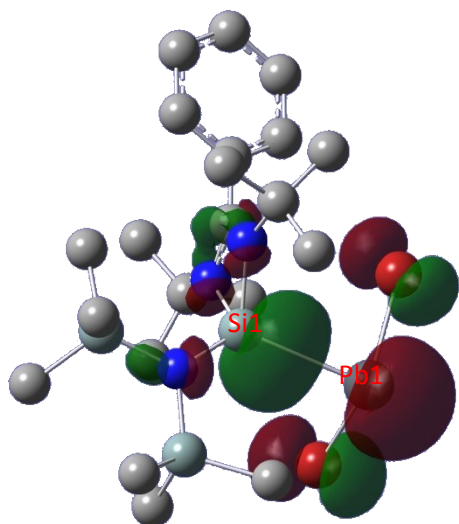

**Figure S3.** HOMO of calculated compound **3** showing the donor–acceptor interaction between the Si(II) and Pb(II) centres (isovalue = 0.04)

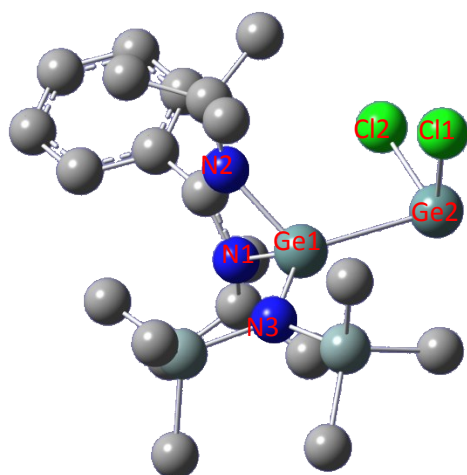

**Figure S4.** Molecular structure of calculated compound **5**. Hydrogen atoms are omitted for clarity. Selected bond lengths (Å) and angles (°): Ge1–Ge2 2.614, Ge1–N1 1.974, Ge1–N2 1.970, Ge1–N3 1.847; Cl1–Ge2–Cl2 98.90, Cl1–Ge2–Ge1 89.52, Cl2–Ge2–Ge1 87.68, N1–Ge1–N2 66.64, N1–Ge1–N3 111.40, N2–Ge1–N3 111.44, N1–Ge1–Ge2 109.90, N2–Ge1–Ge2 113.79, N3–Ge1–Ge2 127.54.

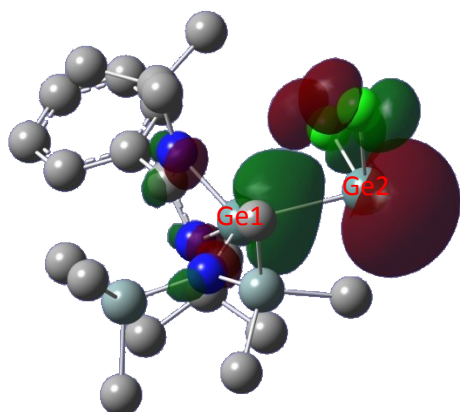

**Figure S5.** HOMO of calculated compound **5** showing the donor–acceptor interaction between the Ge(II) centres (isovalue = 0.04)

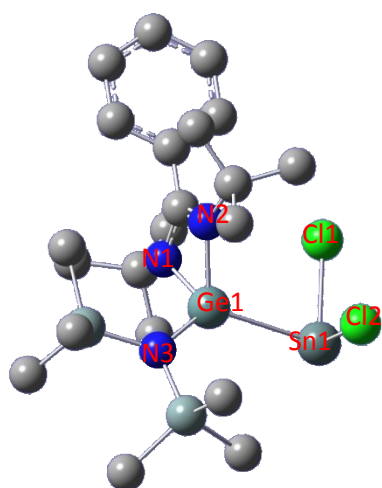

**Figure S6.** Molecular structure of calculated compound **6**. Hydrogen atoms are omitted for clarity. Selected bond lengths (Å) and angles (°): Ge1–Sn1 2.828, Ge1–N1 1.980, Ge1–N2 1.976, Ge1–N3 1.854; Cl1–Sn1–Cl2 97.95, Cl1–Sn1–Ge1 84.00, Cl2–Sn1–Ge1 85.80, N1–Ge1–N2 66.41, N1–Ge1–N3 110.62, N2–Ge1–N3 110.46, N1–Ge1–Sn1 110.60, N2–Ge1–Sn1 112.95, N3–Ge1–Sn1 128.85.

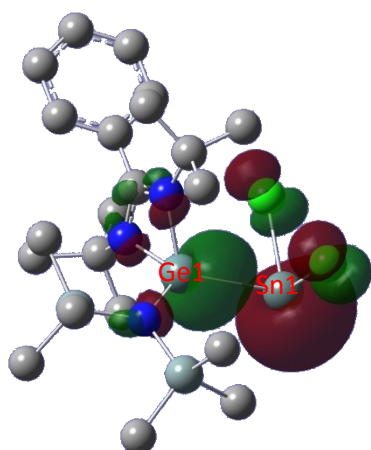

**Figure S7.** HOMO of calculated compound **6** showing the donor–acceptor interaction between the Ge(II) and Sn(II) centres (isovalue = 0.04)

**Table S1.** NBO analysis of the donor–acceptor Si→E: (E = Sn, Pb) interactions in calculated compounds **2** and **3** and the donor–acceptor Ge→E: (E = Ge, Sn) interactions in calculated compounds **5** and **6**

| Bond               | Atom                   | NPA charge | Polarization (%) | s-character (%) | p-character (%) | d-character (%) | Wiberg bond index |
|--------------------|------------------------|------------|------------------|-----------------|-----------------|-----------------|-------------------|
| Si—Sn: in <b>2</b> | Si                     | 1.494      | 74.17            | 31.87           | 67.96           | 0.17            | 0.699             |
|                    | Sn                     | 0.902      | 25.83            | 5.76            | 93.60           | 0.65            |                   |
| Si—Pb: in <b>3</b> | Si                     | 1.486      | 74.87            | 31.87           | 67.99           | 0.13            | 0.678             |
|                    | Pb                     | 0.869      | 25.13            | 4.30            | 95.50           | 0.20            |                   |
| Ge—Ge: in <b>5</b> | Ge <sub>donor</sub>    | 1.706      | 61.76            | 30.86           | 68.89           | 0.25            | 0.849             |
|                    | Ge <sub>acceptor</sub> | 0.529      | 38.24            | 6.34            | 92.19           | 1.47            |                   |
| Ge—Sn: in <b>6</b> | Ge                     | 1.533      | 73.12            | 31.22           | 68.45           | 0.33            | 0.698             |
|                    | Sn                     | 0.929      | 26.88            | 5.11            | 94.04           | 0.85            |                   |

**Table S2.** The bond dissociation energies (BDEs) of  $[L\{(Me_3Si)_2N\}SiEX_2]$  (**2**: E = Sn, X = Cl; **3**: E = Pb, X = Br) into  $[L\{(Me_3Si)_2N\}Si:]$  and  $EX_2$ ; the bond dissociation energies of  $[L\{(Me_3Si)_2N\}GeECl_2]$  (**5**: E = Ge; **6**: E = Sn) into  $[L\{(Me_3Si)_2N\}Ge:]$  and  $ECl_2$ ; the bond dissociation energies of  $H_3Si-EH_3$  into  $H_3Si\cdot$  and  $H_3E\cdot$  (E = Sn, Pb) and the bond dissociation energies of  $H_3Ge-EH_3$  into  $H_3Ge\cdot$  and  $H_3E\cdot$  (E = Ge, Sn)

| Compound   | <b>2</b>                           | <b>3</b>                           | <b>5</b>                           | <b>6</b>                           |
|------------|------------------------------------|------------------------------------|------------------------------------|------------------------------------|
| <i>BDE</i> | 43.94                              | 41.95                              | 34.67                              | 35.93                              |
| Compound   | SiH <sub>3</sub> -SnH <sub>3</sub> | SiH <sub>3</sub> -PbH <sub>3</sub> | GeH <sub>3</sub> -GeH <sub>3</sub> | GeH <sub>3</sub> -SnH <sub>3</sub> |
| <i>BDE</i> | 68.34                              | 62.03                              | 64.30                              | 64.57                              |

### 3. Selected NMR spectra of **2**, **3** and **6**

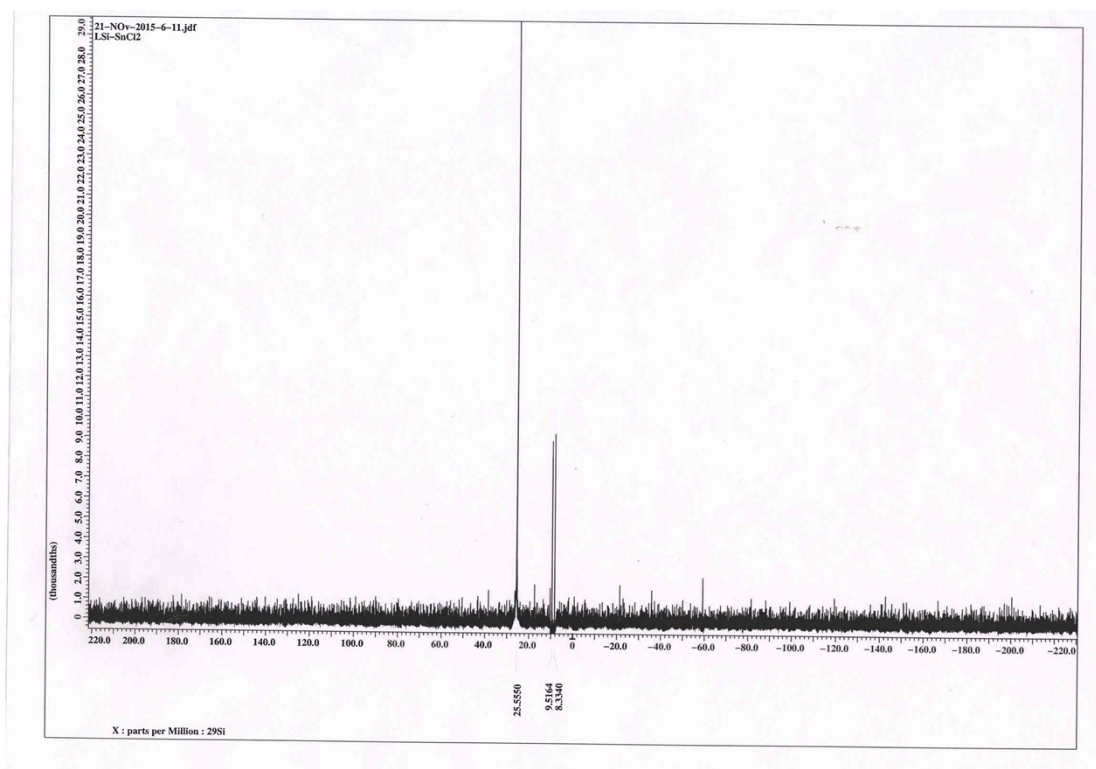

(a)  $^{29}Si$  NMR spectrum of compound **2**

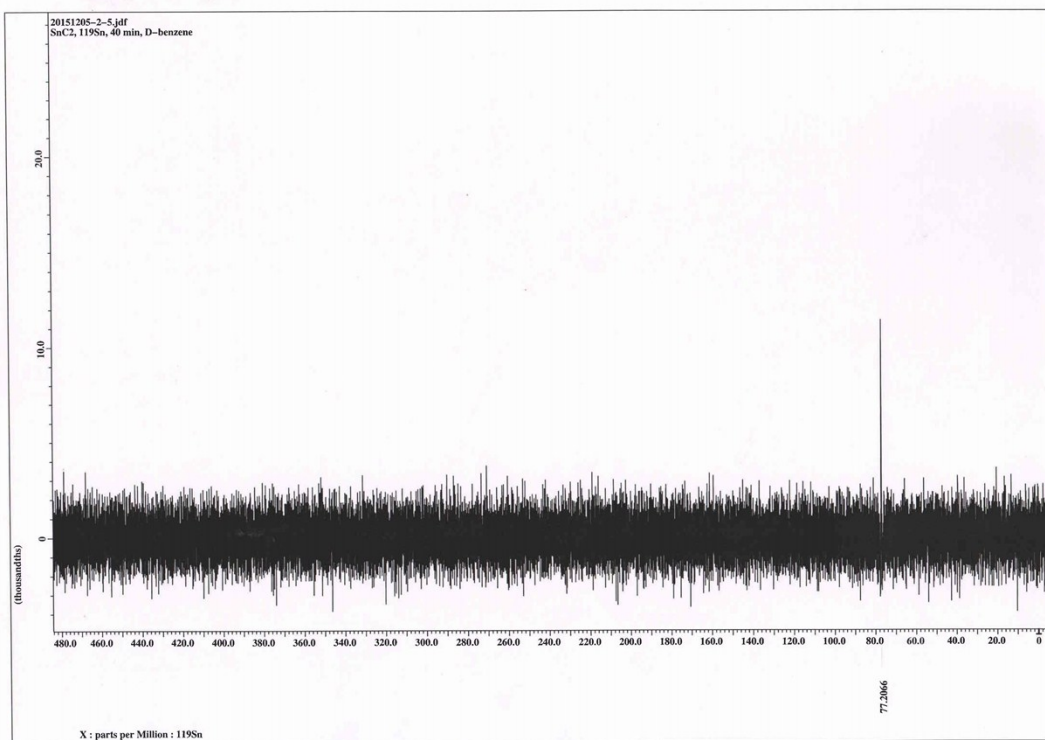

(b)  $^{119}\text{Sn}$  NMR spectrum of compound 2

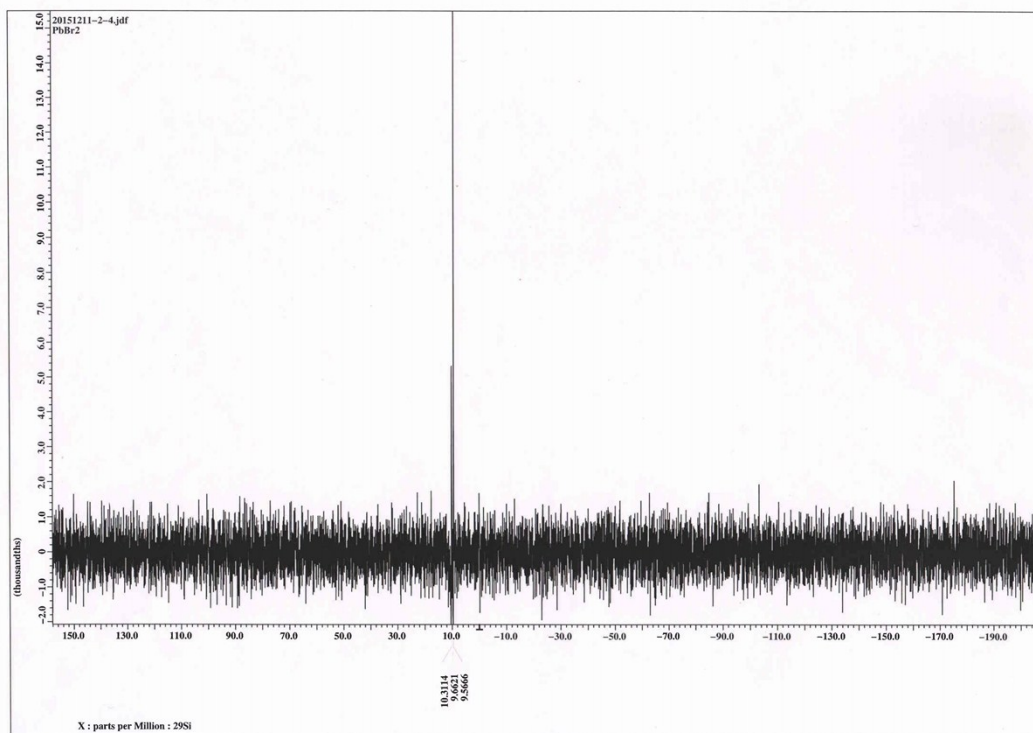

(c)  $^{29}\text{Si}$  NMR spectrum of compound 3

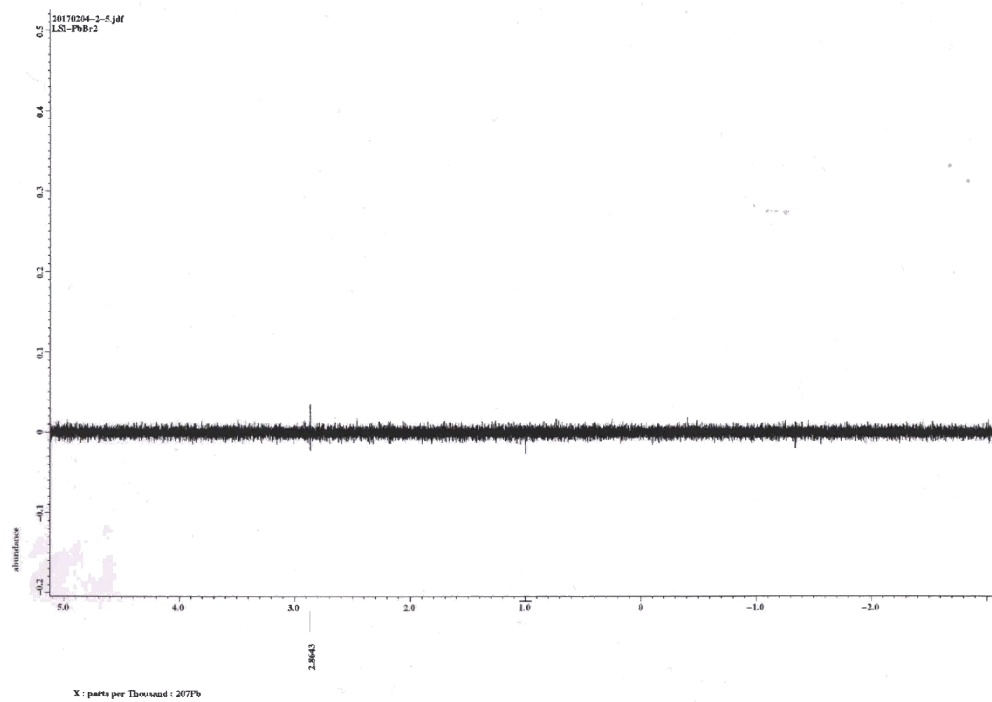

(d)  $^{207}\text{Pb}$  NMR spectrum of compound **3**



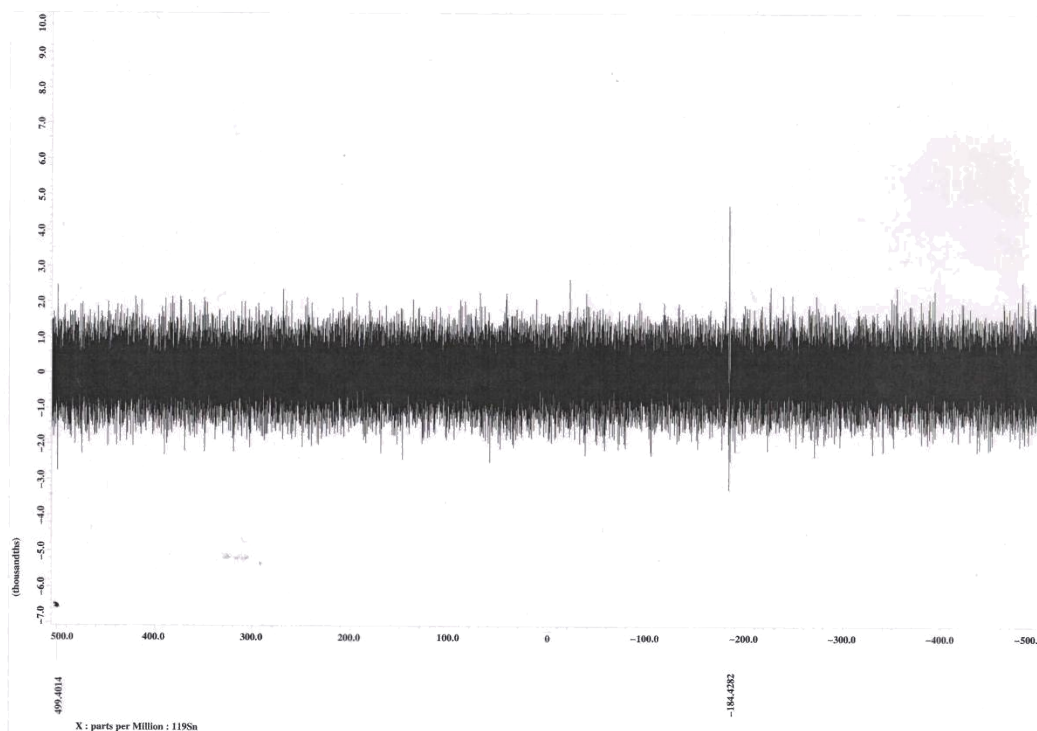

(e)  $^{119}\text{Sn}$  NMR spectrum of compound **6**

#### 4. Selected crystallographic data of **2**, **3**, **5**, and **6**.

|                                               | <b>2</b>                                                              | <b>3</b>                                                       | <b>5</b>                                                                | <b>6</b>                                                                              |
|-----------------------------------------------|-----------------------------------------------------------------------|----------------------------------------------------------------|-------------------------------------------------------------------------|---------------------------------------------------------------------------------------|
| Formula                                       | $\text{C}_{28}\text{H}_{49}\text{Cl}_2\text{N}_3\text{Si}_3\text{Sn}$ | $\text{C}_{21}\text{H}_{41}\text{Br}_2\text{N}_3\text{PbSi}_3$ | $\text{C}_{21}\text{H}_{41}\text{Cl}_2\text{Ge}_2\text{N}_3\text{Si}_2$ | $\text{C}_{23}\text{H}_{45}\text{Cl}_2\text{GeN}_3\text{O}_{0.5}\text{Si}_2\text{Sn}$ |
| <i>M</i>                                      | 701.56                                                                | 786.85                                                         | 607.83                                                                  | 689.98                                                                                |
| Color                                         | colorless                                                             | yellow                                                         | colorless                                                               | colorless                                                                             |
| Crystal System                                | triclinic                                                             | monoclinic                                                     | monoclinic                                                              | triclinic                                                                             |
| Space group                                   | P -1                                                                  | P 1 21/c 1                                                     | P 1 21/c 1                                                              | P -1                                                                                  |
| <i>a</i> /Å                                   | 10.4822(13)                                                           | 11.0430(8)                                                     | 8.7099(14)                                                              | 9.0571(5)                                                                             |
| <i>b</i> /Å                                   | 12.7267(14)                                                           | 17.9127(12)                                                    | 8.9827 (7)                                                              | 11.1854(6)                                                                            |
| <i>c</i> /Å                                   | 26.832(3)                                                             | 15.2372(10)                                                    | 18.1042(12)                                                             | 16.8300(10)                                                                           |
| $\alpha$ /deg                                 | 90.404(3)                                                             | 90                                                             | 90                                                                      | 107.251(2)                                                                            |
| $\beta$ /deg                                  | 90.567(3)                                                             | 91.423(3)                                                      | 106.594(2)                                                              | 98.186(2)                                                                             |
| $\gamma$ /deg                                 | 102.754(3)                                                            | 90                                                             | 90                                                                      | 104.147(2)                                                                            |
| <i>V</i> /Å <sup>3</sup>                      | 3490.9(7)                                                             | 3013.1(4)                                                      | 2916.0(4)                                                               | 1570.91(15)                                                                           |
| <i>Z</i>                                      | 4                                                                     | 4                                                              | 4                                                                       | 2                                                                                     |
| <i>d</i> <sub>calcd</sub> /g cm <sup>-3</sup> | 1.335                                                                 | 1.735                                                          | 1.385                                                                   | 1.459                                                                                 |
| $\mu$ /mm <sup>-1</sup>                       | 1.009                                                                 | 8.384                                                          | 2.340                                                                   | 2.016                                                                                 |
| <i>F</i> (000)                                | 1455                                                                  | 1528                                                           | 1256                                                                    | 704                                                                                   |
| Crystal size/mm                               | 0.140 x 0.180 x<br>0.280                                              | 0.180 x 0.260 x<br>0.340                                       | 0.280 x 0.300 x 0.420                                                   | 0.240 x 0.260 x 0.420                                                                 |
| Index range                                   | -13 ≤ <i>h</i> ≤ 13                                                   | -14 ≤ <i>h</i> ≤ 14                                            | -27 ≤ <i>h</i> ≤ 26                                                     | -14 ≤ <i>h</i> ≤ 14                                                                   |

|                                      | -17 ≤ k ≤ 16<br>-35 ≤ l ≤ 35 | -24 ≤ k ≤ 24<br>-15 ≤ l ≤ 20 | -12 ≤ k ≤ 12<br>-26 ≤ l ≤ 26 | -17 ≤ k ≤ 17<br>-26 ≤ l ≤ 26 |
|--------------------------------------|------------------------------|------------------------------|------------------------------|------------------------------|
| No. of reflections collected         | 17417                        | 43279                        | 56180                        | 70764                        |
| R1, wR2 [ <i>I</i> > 2σ( <i>I</i> )] | 0.0773, 0.1410               | 0.0404, 0.0690               | 0.0360, 0.0712               | 0.0442, 0.0874               |
| R1, wR2 (all data)                   | 0.1434, 0.1655               | 0.0715, 0.0760               | 0.0645, 0.0807               | 0.0708, 0.0976               |
| GOF, F <sup>2</sup>                  | 1.053                        | 1.007                        | 1.003                        | 1.081                        |
| no. of data/ restraints/<br>param    | 17417 / 670 / 774            | 7806/ 36/ 283                | 9295/ 0/ 283                 | 12678 / 60 / 328             |

## 5. The optimized geometries of compounds **2**, **3**, **5** and **6**

### (a) Compound **2**

Standard orientation:

| Atom | Coordinates (Angstroms) |           |           |
|------|-------------------------|-----------|-----------|
|      | X                       | Y         | Z         |
| C    | -0.985742               | 0.033630  | 2.515174  |
| C    | 0.404558                | 0.213477  | 3.126121  |
| H    | 0.363221                | 0.049214  | 4.204431  |
| H    | 0.787294                | 1.221034  | 2.941499  |
| H    | 1.107456                | -0.511794 | 2.709019  |
| C    | -1.949356               | 1.051936  | 3.132798  |
| H    | -1.897191               | 0.967089  | 4.220502  |
| H    | -2.983053               | 0.870776  | 2.838074  |
| H    | -1.680754               | 2.076754  | 2.864540  |
| C    | -1.488985               | -1.385103 | 2.785068  |
| H    | -0.786839               | -2.131373 | 2.413655  |
| H    | -2.456256               | -1.556910 | 2.308219  |
| H    | -1.608145               | -1.528117 | 3.862549  |
| C    | -1.689345               | 0.461137  | 0.085079  |
| C    | -3.167159               | 0.558481  | 0.213991  |
| C    | -3.737261               | 1.817056  | 0.413190  |
| H    | -3.100424               | 2.692071  | 0.489648  |
| C    | -5.115754               | 1.943361  | 0.510115  |
| H    | -5.557444               | 2.921167  | 0.664462  |
| C    | -5.927505               | 0.816704  | 0.406885  |
| H    | -7.004506               | 0.916846  | 0.480659  |
| C    | -5.357062               | -0.435659 | 0.212912  |
| H    | -5.985607               | -1.315463 | 0.138618  |
| C    | -3.975101               | -0.571867 | 0.116362  |
| H    | -3.522610               | -1.545215 | -0.032080 |
| C    | -1.396137               | 0.667767  | -2.457461 |
| C    | -0.198960               | 1.274918  | -3.193306 |
| H    | -0.005748               | 2.292029  | -2.842548 |
| H    | -0.389440               | 1.308920  | -4.267611 |
| H    | 0.707153                | 0.682220  | -3.030223 |
| C    | -2.618753               | 1.566981  | -2.665667 |
| H    | -3.537434               | 1.109019  | -2.298977 |
| H    | -2.740519               | 1.745178  | -3.736578 |
| H    | -2.495405               | 2.535564  | -2.175893 |
| C    | -1.695375               | -0.730594 | -3.001333 |
| H    | -0.814079               | -1.374802 | -2.944590 |
| H    | -2.000670               | -0.668851 | -4.049145 |
| H    | -2.493404               | -1.210042 | -2.431775 |
| C    | -0.355719               | 3.419220  | 0.196734  |
| H    | -0.932795               | 3.194406  | -0.700380 |
| H    | -0.409087               | 4.499533  | 0.366071  |
| H    | -0.824318               | 2.927022  | 1.049287  |
| C    | 2.277283                | 3.691200  | 1.567467  |
| H    | 1.813987                | 3.287113  | 2.471897  |
| H    | 2.130080                | 4.775678  | 1.587058  |
| H    | 3.350354                | 3.509606  | 1.643713  |
| C    | 2.085601                | 3.867164  | -1.520466 |
| H    | 3.031476                | 4.387142  | -1.357262 |
| H    | 1.356009                | 4.612805  | -1.849841 |
| H    | 2.235328                | 3.168119  | -2.346481 |
| C    | 3.909666                | 0.376304  | 1.837167  |
| H    | 3.615514                | 1.187933  | 2.507577  |
| H    | 4.987208                | 0.223322  | 1.950226  |
| H    | 3.416387                | -0.538823 | 2.176646  |
| C    | 4.619341                | 2.074762  | -0.624857 |
| H    | 4.452763                | 2.243440  | -1.691454 |
| H    | 5.645367                | 1.710555  | -0.512383 |
| H    | 4.569184                | 3.039952  | -0.120937 |
| C    | 3.860086                | -0.785436 | -0.985561 |

|    |           |           |           |
|----|-----------|-----------|-----------|
| H  | 3.676962  | -1.720019 | -0.450929 |
| H  | 4.927993  | -0.776428 | -1.224997 |
| H  | 3.323137  | -0.806295 | -1.937975 |
| Cl | -1.413973 | -3.013808 | -0.254269 |
| Cl | 1.833490  | -2.958436 | 1.512690  |
| N  | -0.807229 | 0.268734  | 1.064975  |
| N  | -0.981860 | 0.591531  | -1.044122 |
| N  | 1.773865  | 1.237983  | -0.091273 |
| Si | 0.546775  | 0.013178  | -0.170809 |
| Si | 1.461326  | 2.982331  | 0.026210  |
| Si | 3.480867  | 0.735933  | 0.050489  |
| Sn | 0.977363  | -2.668456 | -0.789829 |

-----

|                             |           |           |           |
|-----------------------------|-----------|-----------|-----------|
| Rotational constants (GHZ): | 0.1252833 | 0.0994310 | 0.0784091 |
|-----------------------------|-----------|-----------|-----------|

## (b) Compound 3

Standard orientation:

| Atom | Coordinates (Angstroms) |           |           |
|------|-------------------------|-----------|-----------|
|      | X                       | Y         | Z         |
| Pb   | 1.605576                | -1.768448 | -0.813386 |
| Br   | -0.749211               | -3.052397 | -0.411590 |
| Br   | 2.667939                | -1.752483 | 1.680465  |
| Si   | 0.224646                | 0.632386  | -0.167738 |
| Si   | 0.096372                | 3.742173  | 0.038960  |
| Si   | 2.748778                | 2.326537  | -0.112952 |
| C    | -1.913357               | 0.615913  | -2.402905 |
| C    | -2.609233               | 1.933678  | -2.756622 |
| H    | -1.935632               | 2.783496  | -2.620652 |
| H    | -3.494084               | 2.082903  | -2.133264 |
| H    | -2.934775               | 1.917592  | -3.799641 |
| C    | -0.663720               | 0.457456  | -3.274142 |
| H    | 0.077906                | 1.228503  | -3.039469 |
| H    | -0.925938               | 0.550423  | -4.329581 |
| H    | -0.211287               | -0.527809 | -3.129334 |
| C    | -2.856571               | -0.562219 | -2.664597 |
| H    | -2.439295               | -1.489610 | -2.266874 |
| H    | -2.988281               | -0.676456 | -3.743690 |
| H    | -3.843286               | -0.404937 | -2.227568 |
| C    | -2.037048               | 0.350684  | 0.140885  |
| C    | -3.470036               | -0.000715 | 0.321433  |
| C    | -4.416858               | 1.023019  | 0.334802  |
| H    | -4.103188               | 2.054833  | 0.226852  |
| C    | -5.760876               | 0.721362  | 0.521479  |
| H    | -6.492883               | 1.520517  | 0.540164  |
| C    | -6.161430               | -0.599741 | 0.688970  |
| H    | -7.210079               | -0.833793 | 0.832805  |
| C    | -5.214868               | -1.619284 | 0.673646  |
| H    | -5.523115               | -2.650583 | 0.799633  |
| C    | -3.868509               | -1.325471 | 0.494245  |
| H    | -3.128585               | -2.115865 | 0.461752  |
| C    | -1.172885               | 0.187881  | 2.552171  |
| C    | 0.035974                | 0.923164  | 3.135635  |
| H    | 0.073165                | 0.782504  | 4.217460  |
| H    | -0.017751               | 1.995261  | 2.925350  |
| H    | 0.967746                | 0.528951  | 2.720299  |
| C    | -1.052641               | -1.309412 | 2.838282  |
| H    | -0.137720               | -1.718717 | 2.409622  |
| H    | -1.900730               | -1.856401 | 2.423657  |
| H    | -1.030673               | -1.475413 | 3.918600  |
| C    | -2.458552               | 0.733588  | 3.182425  |
| H    | -2.361307               | 0.673407  | 4.268713  |
| H    | -3.337924               | 0.155196  | 2.898473  |
| H    | -2.632522               | 1.779480  | 2.920884  |
| C    | -1.718429               | 3.557838  | 0.468991  |
| H    | -2.287218               | 3.093712  | -0.335040 |
| H    | -2.116617               | 4.567195  | 0.615097  |
| H    | -1.887144               | 3.000829  | 1.389938  |
| C    | 0.161742                | 4.691913  | -1.590099 |
| H    | 0.994496                | 5.394875  | -1.644284 |
| H    | -0.759621               | 5.264829  | -1.730594 |
| H    | 0.256453                | 4.009704  | -2.439670 |
| C    | 0.813833                | 4.770758  | 1.442881  |
| H    | 0.629908                | 4.284645  | 2.405272  |
| H    | 0.303374                | 5.738753  | 1.469691  |
| H    | 1.883595                | 4.971472  | 1.379475  |
| C    | 3.298766                | 3.918158  | -0.956238 |
| H    | 2.995437                | 3.929753  | -2.006933 |
| H    | 4.392956                | 3.936437  | -0.937406 |
| H    | 2.958131                | 4.847348  | -0.500099 |
| C    | 3.402624                | 2.238955  | 1.637557  |
| H    | 2.921370                | 2.960937  | 2.301553  |

|   |           |          |           |
|---|-----------|----------|-----------|
| H | 4.479731  | 2.429872 | 1.658675  |
| H | 3.242721  | 1.239027 | 2.051662  |
| C | 3.568341  | 0.969276 | -1.126405 |
| H | 3.763310  | 0.068895 | -0.539079 |
| H | 4.546810  | 1.334517 | -1.452907 |
| H | 3.014705  | 0.709655 | -2.033602 |
| N | -1.430510 | 0.674075 | -1.009431 |
| N | -1.115312 | 0.440182 | 1.096128  |
| N | 0.970165  | 2.203087 | -0.119412 |

-----  
Rotational constants (GHZ):      0.0977260      0.0846458      0.0630661

### (c) Compound 5

Standard orientation:

| Atom | Coordinates (Angstroms) |           |           |
|------|-------------------------|-----------|-----------|
|      | X                       | Y         | Z         |
| Ge   | -0.618987               | -0.257258 | -0.224324 |
| Ge   | -0.861705               | -2.759928 | -0.937261 |
| C    | 1.417506                | 0.723587  | -2.466138 |
| C    | 0.282895                | 0.166446  | -3.331207 |
| H    | 0.196230                | -0.917487 | -3.208889 |
| H    | 0.472704                | 0.370863  | -4.386439 |
| H    | -0.673366               | 0.630720  | -3.065370 |
| C    | 2.713227                | -0.020030 | -2.807529 |
| H    | 3.589411                | 0.451435  | -2.361187 |
| H    | 2.850439                | -0.012933 | -3.891686 |
| H    | 2.663361                | -1.058706 | -2.473817 |
| C    | 1.579344                | 2.220701  | -2.746470 |
| H    | 0.645861                | 2.756526  | -2.556354 |
| H    | 1.860138                | 2.381714  | -3.790303 |
| H    | 2.363365                | 2.649828  | -2.118249 |
| C    | 1.683629                | 0.395945  | 0.056589  |
| C    | 3.149320                | 0.597127  | 0.195027  |
| C    | 3.656047                | 1.891984  | 0.286860  |
| H    | 2.980014                | 2.740113  | 0.265223  |
| C    | 5.023829                | 2.088484  | 0.440663  |
| H    | 5.417734                | 3.095036  | 0.521260  |
| C    | 5.882307                | 0.995522  | 0.496627  |
| H    | 6.948678                | 1.150607  | 0.615181  |
| C    | 5.373146                | -0.296269 | 0.399532  |
| H    | 6.041010                | -1.149057 | 0.435979  |
| C    | 4.006851                | -0.500767 | 0.251706  |
| H    | 3.601885                | -1.502013 | 0.157196  |
| C    | 1.084188                | -0.206492 | 2.473846  |
| C    | 1.579291                | -1.640095 | 2.679074  |
| H    | 0.876522                | -2.364449 | 2.266861  |
| H    | 1.692564                | -1.838081 | 3.748444  |
| H    | 2.548562                | -1.791200 | 2.201129  |
| C    | 2.076916                | 0.777022  | 3.105636  |
| H    | 3.103510                | 0.585602  | 2.792306  |
| H    | 2.037347                | 0.662061  | 4.191164  |
| H    | 1.831502                | 1.814465  | 2.868476  |
| C    | -0.288095               | -0.041403 | 3.133632  |
| H    | -0.673917               | 0.971745  | 2.988335  |
| H    | -0.218641               | -0.236599 | 4.205296  |
| H    | -1.007123               | -0.752221 | 2.714484  |
| C    | -3.843873               | -1.132707 | -1.070514 |
| H    | -3.301741               | -1.067033 | -2.018147 |
| H    | -4.905334               | -1.232016 | -1.318114 |
| H    | -3.559313               | -2.059888 | -0.567849 |
| C    | -4.827200               | 1.664780  | -0.679779 |
| H    | -4.858259               | 2.618592  | -0.152475 |
| H    | -5.835113               | 1.240911  | -0.632832 |
| H    | -4.611471               | 1.868086  | -1.732177 |
| C    | -4.095172               | -0.079035 | 1.770778  |
| H    | -3.506730               | -0.943651 | 2.094076  |
| H    | -5.149647               | -0.361326 | 1.842163  |
| H    | -3.915243               | 0.731978  | 2.480335  |
| C    | -2.193360               | 3.687521  | -1.314213 |
| H    | -1.888294               | 3.148795  | -2.216295 |
| H    | -1.694462               | 4.660996  | -1.328187 |
| H    | -3.266633               | 3.868021  | -1.391139 |
| C    | -2.697528               | 3.312600  | 1.719880  |
| H    | -3.761818               | 3.075710  | 1.688474  |
| H    | -2.609541               | 4.400064  | 1.808022  |
| H    | -2.294415               | 2.880493  | 2.640543  |
| C    | 0.069036                | 3.186454  | 0.610268  |
| H    | 0.463429                | 2.661630  | 1.480065  |
| H    | 0.083831                | 4.258021  | 0.833713  |
| H    | 0.736071                | 3.015106  | -0.234241 |

|    |           |           |           |
|----|-----------|-----------|-----------|
| Cl | -1.543797 | -3.284898 | 1.208341  |
| Cl | 1.426535  | -2.966804 | -0.646551 |
| N  | 0.980398  | 0.530661  | -1.071512 |
| N  | 0.854816  | 0.069220  | 1.041697  |
| N  | -1.964311 | 0.993267  | -0.031242 |
| Si | -3.633292 | 0.385834  | 0.015146  |
| Si | -1.708682 | 2.723176  | 0.229648  |

-----  
Rotational constants (GHZ):        0.1375700        0.0986256        0.0818144

## (d) Compound 6

Standard orientation:

| ----- |                         |           |           |
|-------|-------------------------|-----------|-----------|
| Atom  | Coordinates (Angstroms) |           |           |
|       | X                       | Y         | Z         |
| ----- |                         |           |           |
| C     | 1.525603                | 0.629064  | -2.480904 |
| C     | 0.342380                | 0.139604  | -3.322020 |
| H     | 0.151492                | -0.923412 | -3.146345 |
| H     | 0.550943                | 0.269865  | -4.385388 |
| H     | -0.564778               | 0.705814  | -3.084152 |
| C     | 2.737676                | -0.266460 | -2.759784 |
| H     | 3.658649                | 0.147188  | -2.347629 |
| H     | 2.871844                | -0.358653 | -3.840657 |
| H     | 2.585705                | -1.265182 | -2.344446 |
| C     | 1.843165                | 2.078444  | -2.862906 |
| H     | 0.968292                | 2.719549  | -2.727956 |
| H     | 2.148959                | 2.132616  | -3.910800 |
| H     | 2.662062                | 2.470121  | -2.255388 |
| C     | 1.759874                | 0.456391  | 0.057138  |
| C     | 3.236715                | 0.566209  | 0.188303  |
| C     | 4.021414                | -0.577812 | 0.326172  |
| H     | 3.553501                | -1.555240 | 0.298916  |
| C     | 5.397972                | -0.452119 | 0.467281  |
| H     | 6.008489                | -1.342200 | 0.566162  |
| C     | 5.990399                | 0.807145  | 0.477331  |
| H     | 7.064570                | 0.900249  | 0.590948  |
| C     | 5.204643                | 1.946626  | 0.341756  |
| H     | 5.661953                | 2.929202  | 0.356218  |
| C     | 3.827392                | 1.828434  | 0.194148  |
| H     | 3.208300                | 2.715655  | 0.114799  |
| C     | 1.117981                | 0.062313  | 2.506085  |
| C     | 2.180131                | 1.012295  | 3.072289  |
| H     | 3.188722                | 0.736130  | 2.763875  |
| H     | 2.143383                | 0.963520  | 4.162919  |
| H     | 1.999537                | 2.048169  | 2.776820  |
| C     | 1.504119                | -1.385461 | 2.817586  |
| H     | 0.750225                | -2.083605 | 2.453282  |
| H     | 1.598639                | -1.514131 | 3.899412  |
| H     | 2.459821                | -1.642537 | 2.358023  |
| C     | -0.238862               | 0.376534  | 3.143138  |
| H     | -0.548436               | 1.402427  | 2.922858  |
| H     | -0.186188               | 0.253568  | 4.226569  |
| H     | -1.007118               | -0.308049 | 2.770704  |
| C     | 0.390065                | 3.395031  | 0.384929  |
| H     | 0.756404                | 2.886861  | 1.276718  |
| H     | 0.486920                | 4.472512  | 0.551955  |
| H     | 1.029417                | 3.129970  | -0.456503 |
| C     | -2.341897               | 3.838857  | 1.485784  |
| H     | -3.424792               | 3.708727  | 1.474331  |
| H     | -2.144183               | 4.915250  | 1.491810  |
| H     | -1.975264               | 3.438224  | 2.435659  |
| C     | -1.834523               | 3.920050  | -1.567860 |
| H     | -1.499433               | 3.327226  | -2.424314 |
| H     | -1.321786               | 4.885374  | -1.617186 |
| H     | -2.900953               | 4.107606  | -1.700884 |
| C     | -4.638655               | 2.158647  | -0.738797 |
| H     | -4.572683               | 3.164398  | -0.322569 |
| H     | -5.676666               | 1.831442  | -0.623844 |
| H     | -4.438752               | 2.225721  | -1.811761 |
| C     | -3.995871               | 0.615320  | 1.865070  |
| H     | -3.466589               | -0.253649 | 2.268988  |
| H     | -5.066807               | 0.419074  | 1.971773  |
| H     | -3.749357               | 1.477232  | 2.489559  |
| C     | -3.895385               | -0.733607 | -0.848838 |
| H     | -3.382163               | -0.809196 | -1.812176 |
| H     | -4.968847               | -0.770554 | -1.058922 |
| H     | -3.672806               | -1.620554 | -0.250265 |
| Cl    | 1.389777                | -3.000568 | -0.345488 |
| Cl    | -1.778871               | -2.948150 | 1.610839  |
| Ge    | -0.589911               | -0.051424 | -0.193177 |
| N     | 1.066597                | 0.572086  | -1.080872 |
| N     | 0.911541                | 0.249235  | 1.056004  |

|    |           |           |           |
|----|-----------|-----------|-----------|
| N  | -1.822774 | 1.327654  | -0.068645 |
| Si | -1.422151 | 3.044281  | 0.046405  |
| Si | -3.530310 | 0.868956  | 0.067764  |
| Sn | -1.040151 | -2.789682 | -0.736992 |

---

|                             |           |           |           |
|-----------------------------|-----------|-----------|-----------|
| Rotational constants (GHZ): | 0.1213311 | 0.0966199 | 0.0754789 |
|-----------------------------|-----------|-----------|-----------|

## 6. References

1. a) D. Feller, *J. Chem. Phys.*, 1990, **93**, 579-589; b) P. Hohenberg and W. Kohn, *Phys. Rev.*, 1964, **136**, B864-B871.
2. Y. Zhao and D. G. Truhlar, *Theor. Chem. Acc.*, 2008, **120**, 215-41.
3. For LANL08d basis set: (a) C.E. Check, T.O. Faust, J.M. Bailey, B.J. Wright, T.M. Gilbert and L.S. Sunderlin, *J Phys. Chem. A*, 2001, **105**, 8111-8116; For Pople basis set, first-row elements: (b) R. Krishnan, J.S. Binkley, R. Seeger, J.A. Pople, *J. Chem. Phys.*, 1980, **72**, 650-654; second-row elements (c) A.D. McLean, G.S. Chandler, *J. Chem. Phys.*, 1980, **72**, 5639-5648.
4. Gaussian 09, Revision D.01, M. J. Frisch, G. W. Trucks, H. B. Schlegel, G. E. Scuseria, M. A. Robb, J. R. Cheeseman, G. Scalmani, V. Barone, B. Mennucci, G. A. Petersson, H. Nakatsuji, M. Caricato, X. Li, H. P. Hratchian, A. F. Izmaylov, J. Bloino, G. Zheng, J. L. Sonnenberg, M. Hada, M. Ehara, K. Toyota, R. Fukuda, J. Hasegawa, M. Ishida, T. Nakajima, Y. Honda, O. Kitao, H. Nakai, T. Vreven, J. A. Montgomery, Jr., J. E. Peralta, F. Ogliaro, M. Bearpark, J. J. Heyd, E. Brothers, K. N. Kudin, V. N. Staroverov, R. Kobayashi, J. Normand, K. Raghavachari, A. Rendell, J. C. Burant, S. S. Iyengar, J. Tomasi, M. Cossi, N. Rega, J. M. Millam, M. Klene, J. E. Knox, J. B. Cross, V. Bakken, C. Adamo, J. Jaramillo, R. Gomperts, R. E. Stratmann, O. Yazyev, A. J. Austin, R. Cammi, C. Pomelli, J. W. Ochterski, R. L. Martin, K. Morokuma, V. G. Zakrzewski, G. A. Voth, P. Salvador, J. J. Dannenberg, S. Dapprich, A. D. Daniels, Ö. Farkas, J. B. Foresman, J. V. Ortiz, J. Cioslowski, and D. J. Fox, Gaussian, Inc., Wallingford CT, 2013.
5. NBO 5.0, F. Weinhold, Theoretical Chemistry Institute and Department of Chemistry, University of Wisconsin, Madison, Wisconsin 53706.
